# Supplementary material for: Tuning the adsorption and separation properties of noble gases and N2 in CuBTC by ligand functionalization
Source: Royal Society of Chemistry journal article supplement (doi:10.1039/c6ra08778g), 2016-01-01
Supplement: c6ra08778g1.pdf [file c6ra08778g1.pdf]

Electronic Supplementary Information

**Tuning the adsorption and separation properties of noble gases and  
N<sub>2</sub> in CuBTC by ligand functionalization**

Zewei Liu<sup>1</sup>, Ying Wu<sup>1</sup>, Baoyu Liu<sup>1</sup>, Su Cheun Oh<sup>2</sup>, Wei Fan<sup>3</sup>, Yu Qian<sup>1</sup>, Hongxia Xi<sup>1\*</sup>

*1 School of Chemistry and Chemical Engineering, South China University of Technology,*

*Guangzhou 510640, PR China*

*2 Department of Chemical and Biomolecular Engineering, University of Maryland, College Park,*

*Maryland 20742, United States*

*3 Department of Chemical Engineering, University of Massachusetts Amherst, 686 N. Pleasant*

*Street, Amherst, MA 01002, USA*

\* Corresponding author. Tel: +86 13825124468 Fax: +86 20 87113735 E-mail:  
[cehxxi@scut.edu.cn](mailto:cehxxi@scut.edu.cn) (H. Xi).

## Supplementary table

Table S1. Charge for atoms of CuBTCs.

| MOF       | Atom type | Charge  | MOF                     | Atom type | Charge  |
|-----------|-----------|---------|-------------------------|-----------|---------|
| CuBTC     | C1        | 0.7780  | 3F-CuBTC                | C1        | 0.8656  |
|           | C2        | -0.0920 |                         | C2        | -0.3312 |
|           | C3        | -0.0140 |                         | C3        | 0.3722  |
|           | O1        | -0.6650 |                         | O1        | -0.6616 |
|           | Cu1       | 1.0980  |                         | Cu1       | 1.0790  |
|           | H1        | 0.1090  |                         | F         | -0.1229 |
| 3OH-CuBTC | C1        | 0.8643  | 3NH <sub>2</sub> -CuBTC | C1        | 0.9330  |
|           | C2        | -0.5219 |                         | C2        | -0.6699 |
|           | C3        | 0.5569  |                         | C3        | 0.7118  |
|           | O1        | -0.7932 |                         | O1        | -0.7676 |
|           | O2        | -0.6196 |                         | Cu1       | 1.1998  |
|           | O3        | -0.5691 |                         | H1        | 0.4436  |
|           | Cu1       | 1.2069  | N                       | -0.9267   |         |
|           | H1        | 0.4791  |                         |           |         |

Table S2. Force field parameters for adsorbates and adsorbents.

| molecules               | atom | $\sigma(\text{\AA})$ | $\varepsilon/k_b(\text{K})$ |
|-------------------------|------|----------------------|-----------------------------|
| Ar                      | Ar   | 3.405                | 120                         |
| Kr                      | Kr   | 3.690                | 170                         |
| Xe                      | Xe   | 4.100                | 211                         |
| N <sub>2</sub> (2-site) | N    | 3.31                 | 36                          |
|                         | COM  | 0                    | 0                           |
|                         | C    | 3.431                | 52.84                       |
| MOFs                    | H    | 2.42                 | 15.1                        |
|                         | N    | 3.261                | 34.724                      |
|                         | O    | 3.118                | 30.19                       |
|                         | F    | 2.997                | 25.16                       |
|                         | Cu   | 3.114                | 2.516                       |

Table S3. The lattice parameters of all MOFs

| MOFs                    | Cell angle (deg)         | Unit cell (nm) |
|-------------------------|--------------------------|----------------|
| CuBTC                   | $\alpha=\beta=\gamma=90$ | a=b=c=2.634    |
| 3F-CuBTC                | $\alpha=\beta=\gamma=90$ | a=b=c=2.631    |
| 3OH-CuBTC               | $\alpha=\beta=\gamma=90$ | a=b=c=2.638    |
| 3NH <sub>2</sub> -CuBTC | $\alpha=\beta=\gamma=90$ | a=b=c=2.613    |
